# Supplementary material for: A non-spatial account of place and grid cells based on clustering models of concept learning
Source: PubMed Central journal article supplement (PMC6908717; doi:10.1038/s41467-019-13760-8), 2019-12-12
Supplement: 41467_2019_13760_MOESM1_ESM.pdf [file 41467_2019_13760_MOESM1_ESM.pdf]

1 **Supplementary Information**

2 **A non-spatial account of place and grid cells based on clustering models of**  
3 **concept learning**

4 Robert M. Mok<sup>1\*</sup>, Bradley C. Love<sup>1,2\*</sup>

5 **Affiliations:**

6 <sup>1</sup>Department of Experimental Psychology, University College London, 26 Bedford Way,  
7 London, WC1H 0AP, United Kingdom.

8 <sup>2</sup>The Alan Turing Institute, United Kingdom

9 \*Correspondence to: [robert.mok@ucl.ac.uk](mailto:robert.mok@ucl.ac.uk), [b.love@ucl.ac.uk](mailto:b.love@ucl.ac.uk)

10

11

12

13 **SUPPLEMENTARY NOTE 1**

14 **Comparable grid-like map proportions with empirical data**

15 Our simulations produce activations maps that emulate spatial cells in the mEC with  
16 multi-peaks spatial fields, so the appropriate test for the proportion of grid cells is the  
17 number of grid cells relative to the total number of spatial cells with multiple peaks. Most  
18 studies report percentage of grid cells in relation to all cell types (including head-  
19 direction cells, border cells, etc.), but only a few reported and quantified the number of  
20 non-grid spatial cells, or if they are multi-peaked or not.

21

22 Krupic et al.<sup>1</sup> tested rodents in a square environment and reported the percentage of  
23 non-grid spatial cells relative to grid cells, and also the non-grid spatial cells that were  
24 periodic using a Fourier analysis. In the mEC population they found 26% grid cells, and  
25 44% non-grid spatial cells with multiple peaks, which means they found  
26  $(26/(26+44)) \times 100 = 37\%$  grid cells relative to non-grid spatial cells. Using the Fourier  
27 analysis method on only spatial and head-direction cells (ignoring other cells in the  
28 population), they found 35% grid cells and 43% non-grid periodic spatial cells, and 2%  
29 conjunctive grid cells. This amounts to  $(35/(35+43)) \times 100 = 45\%$ , or  $(37/(37+43)) \times 100 =$   
30  $46\%$  grid cells with respect to non-grid periodic grid cells, matching to our 45.3% value  
31 in the square environment. Perez-Escobar et al.<sup>2</sup> tested rodents in a circular  
32 environment and also report the number of non-grid spatial cells, finding 139 grid cells  
33 and 226 non-grid spatial cells, meaning they found  $(139/(139+226)) \times 100 = 38\%$  grid  
34 cells, matching our 38.6% value in the circular environment.

35 The percentage of grid-like cells show very little difference when the parameters are  
36 altered, such as a slower or faster learning rate, or an increase or reduction of the batch  
37 size. These results are provided in the code and simulated data.

38

39

40

41

42

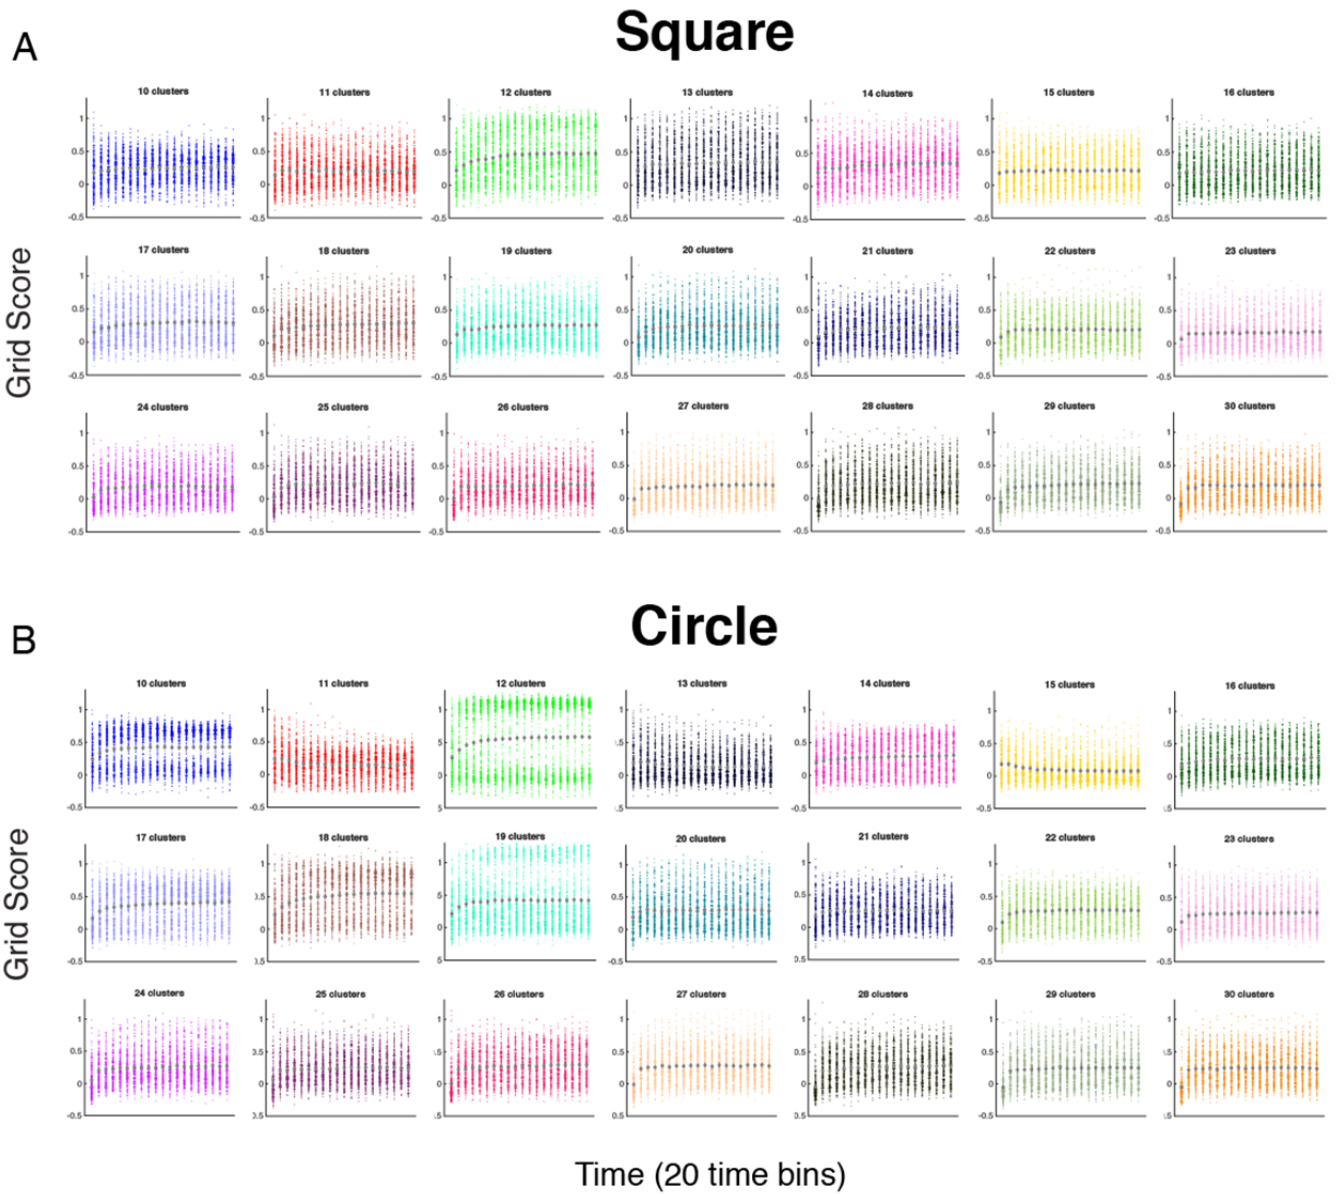

43

44 Supplementary Figure 1. Univariate scatterplots showing grid scores increasing over  
 45 learning in the square (A) and circle (B) for all conditions.

46

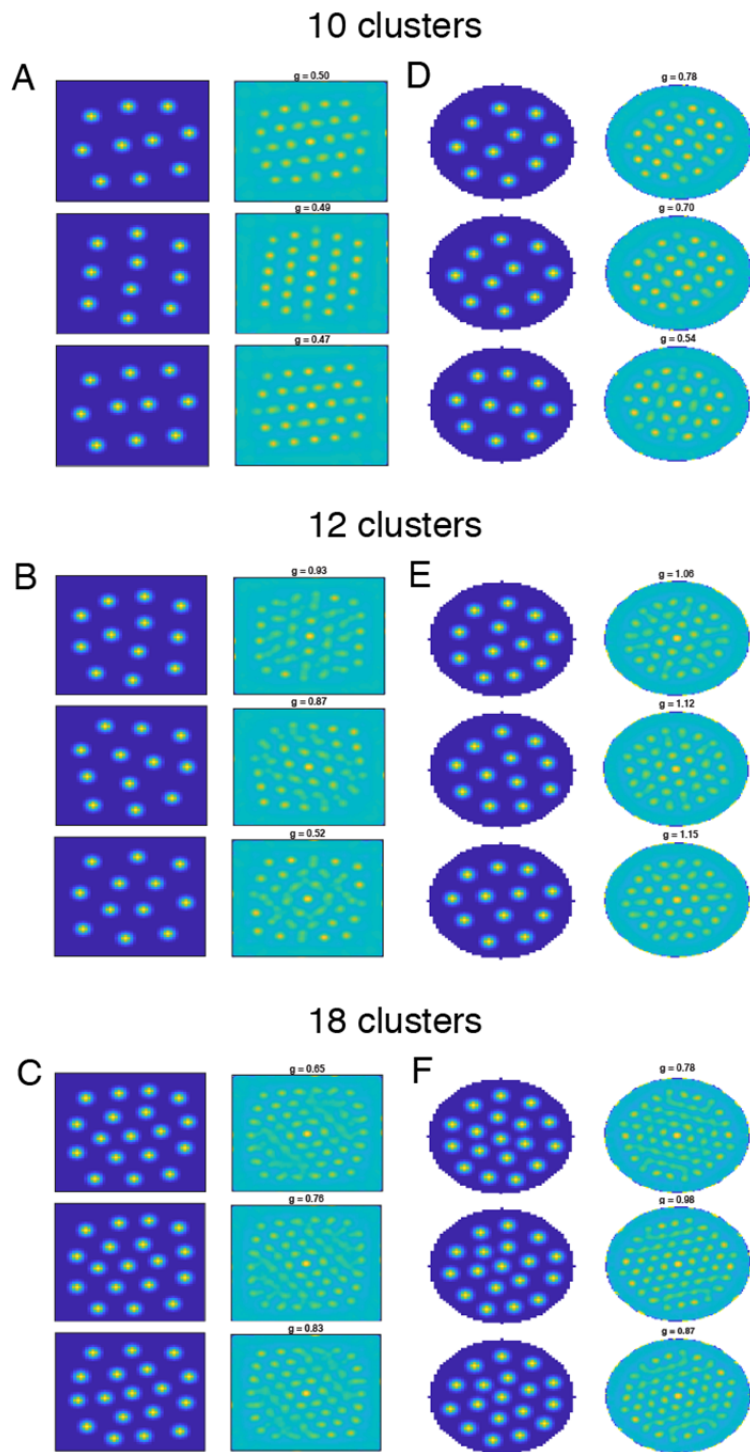

47

48 Supplementary Figure 2. Examples of activation maps with grid patterns (left) and their  
 49 corresponding spatial autocorrelograms (right) in square (A-C) and circular (D-F)  
 50 environments with 10, 12, and 18 clusters.

51

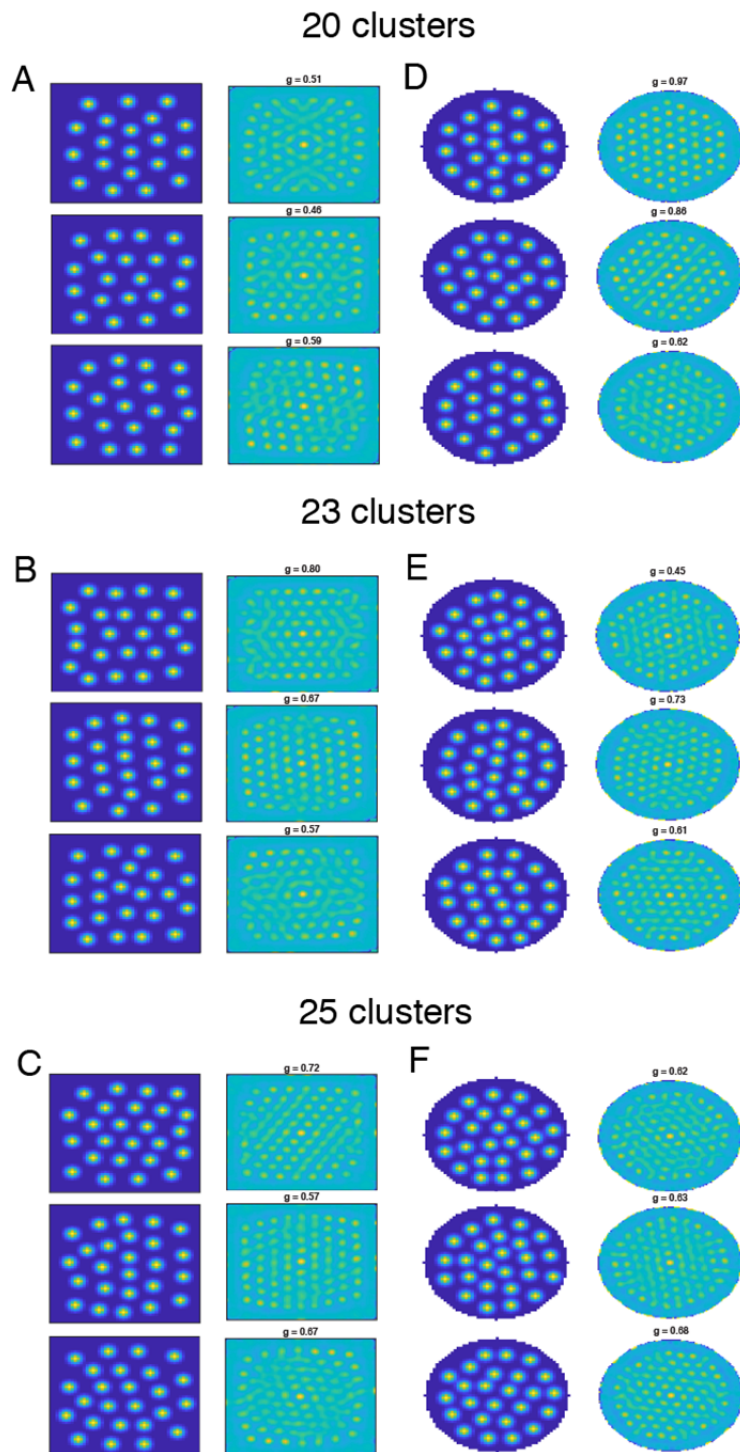

52

53 Supplementary Figure 3. Examples of activation maps with grid patterns (left) and their  
 54 corresponding spatial autocorrelograms (right) in square (A-C) and circular (D-F)  
 55 environments with 20, 23, and 25 clusters.

56

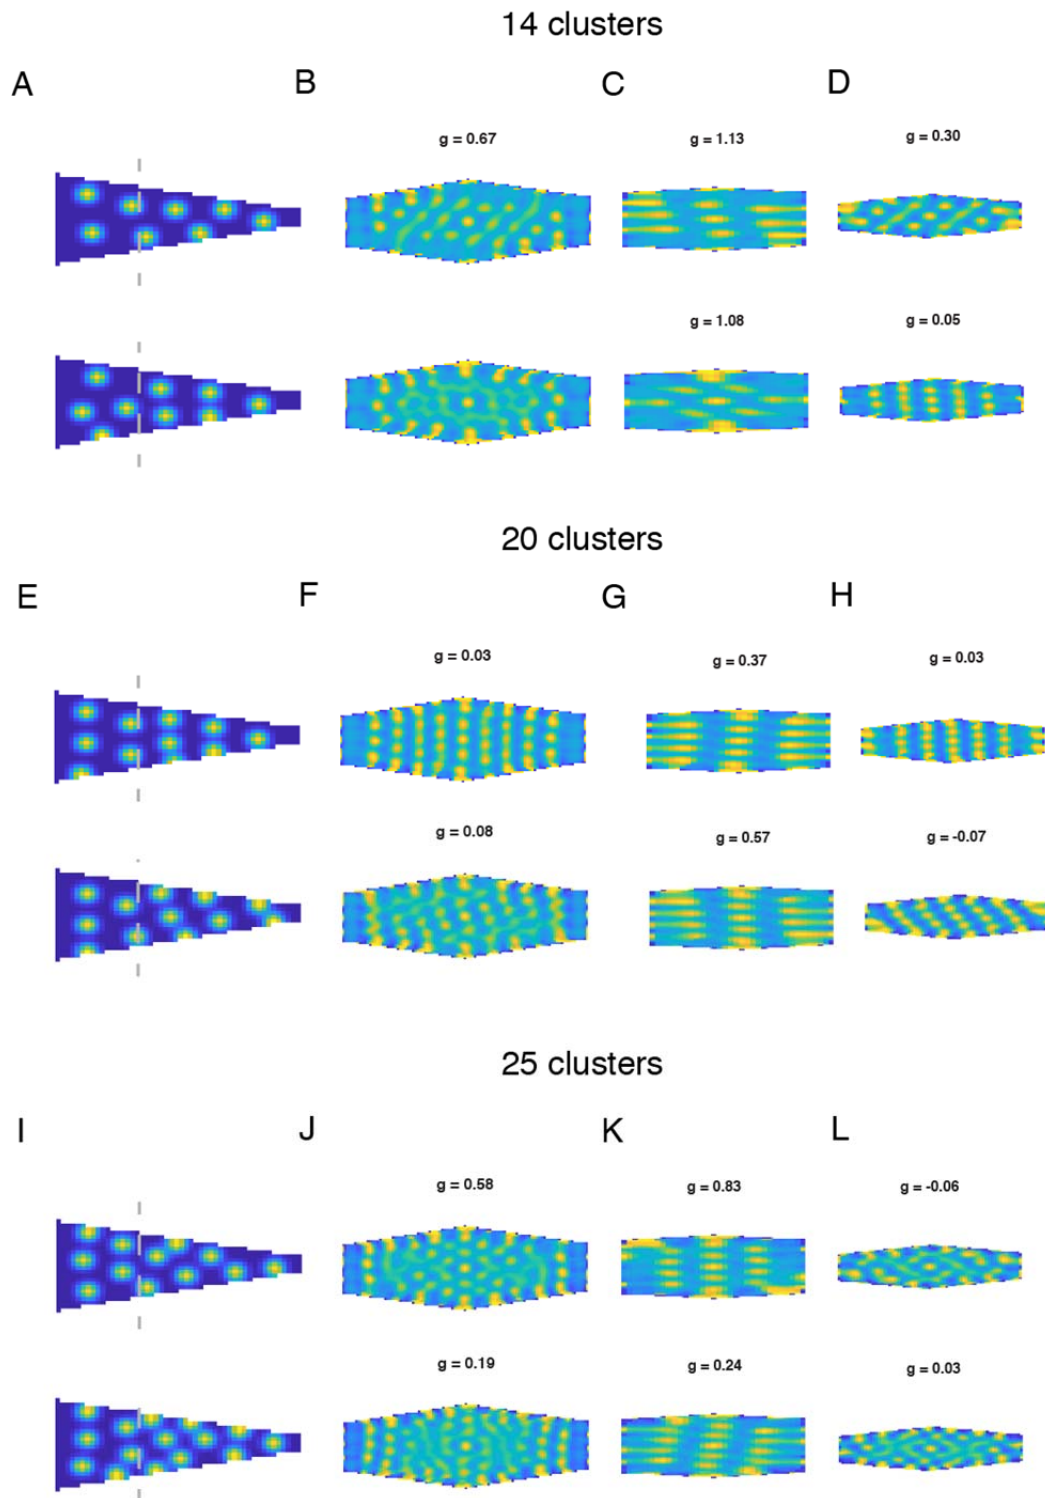

57

58 Supplementary Figure 4. Examples of activation maps in the trapezoid environment and  
 59 their corresponding spatial autocorrelograms with (A-D) 14, (E-H) 20, and (I-L) 25  
 60 clusters. (A) Activation map with 14 clusters, (B) spatial autocorrelogram of the full

61 trapezoid, (C) spatial autocorrelogram of the wide (left) half of the trapezoid, and (D)  
62 spatial autocorrelogram of the narrow (right) half of the trapezoid. Same conventions in  
63 (E-H) and (I-L).

64

65

66



|             | Mean   | bootstrap CIs     |
|-------------|--------|-------------------|
| 10 clusters | 0.0032 | [0.0017, 0.0050]  |
| 11 clusters | 0.0003 | [-0.0011, 0.0021] |
| 12 clusters | 0.0097 | [0.0075, 0.0123]  |
| 13 clusters | 0.0041 | [0.0020, 0.0060]  |
| 14 clusters | 0.0058 | [0.0037, 0.0083]  |
| 15 clusters | 0.0011 | [-0.0006, 0.0031] |
| 16 clusters | 0.0021 | [-0.0001, 0.0035] |
| 17 clusters | 0.0053 | [0.0038, 0.0071]  |
| 18 clusters | 0.0060 | [0.0041, 0.0080]  |
| 19 clusters | 0.0048 | [0.0028, 0.0070]  |
| 20 clusters | 0.0051 | [0.0035, 0.0073]  |
| 21 clusters | 0.0044 | [0.0029, 0.0067]  |
| 22 clusters | 0.0020 | [0.0005, 0.0038]  |
| 23 clusters | 0.0027 | [0.0010, 0.0043]  |
| 24 clusters | 0.0035 | [0.0024, 0.0051]  |
| 25 clusters | 0.0046 | [0.0030, 0.0064]  |
| 26 clusters | 0.0045 | [0.0032, 0.0059]  |
| 27 clusters | 0.0056 | [0.0040, 0.0073]  |
| 28 clusters | 0.0059 | [0.0045, 0.0077]  |
| 29 clusters | 0.0072 | [0.0058, 0.0088]  |
| 30 clusters | 0.0052 | [0.0038, 0.0065]  |

67

68 Supplementary Table 1. Mean slopes bootstrap confidence intervals (CIs) for learning  
69 over time in the square environment for each condition.

70

|             | Mean    | bootstrap CIs      |
|-------------|---------|--------------------|
| 10 clusters | 0.0051  | [0.0035, 0.0066]   |
| 11 clusters | -0.0044 | [-0.0060, -0.0032] |
| 12 clusters | 0.0104  | [0.0081, 0.0131]   |
| 13 clusters | -0.0038 | [-0.0047, -0.0024] |
| 14 clusters | 0.0044  | [0.0031, 0.0059]   |
| 15 clusters | -0.0048 | [-0.0060, -0.0033] |
| 16 clusters | 0.0042  | [0.0029, 0.0059]   |
| 17 clusters | 0.0081  | [0.0065, 0.0096]   |
| 18 clusters | 0.0113  | [0.0091, 0.0135]   |
| 19 clusters | 0.0056  | [0.0033, 0.0084]   |
| 20 clusters | 0.0019  | [0.0003, 0.0039]   |
| 21 clusters | 0.0017  | [0.0003, 0.0033]   |
| 22 clusters | 0.0042  | [0.0026, 0.0057]   |
| 23 clusters | 0.0038  | [0.0023, 0.0052]   |
| 24 clusters | 0.0057  | [0.0040, 0.0073]   |
| 25 clusters | 0.0043  | [0.0031, 0.0057]   |
| 26 clusters | 0.0067  | [0.0053, 0.0081]   |
| 27 clusters | 0.0057  | [0.0045, 0.0069]   |
| 28 clusters | 0.0075  | [0.0059, 0.0091]   |
| 29 clusters | 0.0060  | [0.0046, 0.0073]   |
| 30 clusters | 0.0050  | [0.0032, 0.0061]   |

71

72 Supplementary Table 2. Mean slopes bootstrap CIs for learning over time in the circular  
73 environment for each condition.

74

|             | Mean   | bootstrap CIs    |
|-------------|--------|------------------|
| 10 clusters | 0.2291 | [0.2162, 0.2414] |
| 11 clusters | 0.1821 | [0.1679, 0.1976] |
| 12 clusters | 0.4685 | [0.4478, 0.4905] |
| 13 clusters | 0.3755 | [0.3541, 0.3943] |
| 14 clusters | 0.3554 | [0.3407, 0.3702] |
| 15 clusters | 0.2205 | [0.2037, 0.2373] |
| 16 clusters | 0.2130 | [0.1952, 0.2301] |
| 17 clusters | 0.2891 | [0.2703, 0.3068] |
| 18 clusters | 0.3544 | [0.3370, 0.3734] |
| 19 clusters | 0.2979 | [0.2789, 0.3149] |
| 20 clusters | 0.2941 | [0.2760, 0.3102] |
| 21 clusters | 0.2398 | [0.2245, 0.2551] |
| 22 clusters | 0.2315 | [0.2167, 0.2483] |
| 23 clusters | 0.2118 | [0.1967, 0.2288] |
| 24 clusters | 0.2315 | [0.2166, 0.2473] |
| 25 clusters | 0.2568 | [0.2398, 0.2738] |
| 26 clusters | 0.2644 | [0.2492, 0.2834] |
| 27 clusters | 0.2729 | [0.2559, 0.2898] |
| 28 clusters | 0.2862 | [0.2702, 0.3040] |
| 29 clusters | 0.2785 | [0.2621, 0.2933] |
| 30 clusters | 0.2549 | [0.2390, 0.2692] |

75

76 Supplementary Table 3. Mean grid scores and bootstrap CIs in the square environment

77 for each condition.

78

|             | Mean   | bootstrap CIs    |
|-------------|--------|------------------|
| 10 clusters | 0.4154 | [0.3961, 0.4339] |
| 11 clusters | 0.1071 | [0.0961, 0.1184] |
| 12 clusters | 0.5691 | [0.5320, 0.6081] |
| 13 clusters | 0.1003 | [0.0893, 0.1133] |
| 14 clusters | 0.2975 | [0.2803, 0.3147] |
| 15 clusters | 0.0896 | [0.0776, 0.1022] |
| 16 clusters | 0.2859 | [0.2693, 0.3050] |
| 17 clusters | 0.4905 | [0.4699, 0.5086] |
| 18 clusters | 0.5854 | [0.5625, 0.6063] |
| 19 clusters | 0.4141 | [0.3901, 0.4424] |
| 20 clusters | 0.3430 | [0.3238, 0.3623] |
| 21 clusters | 0.2894 | [0.2720, 0.3060] |
| 22 clusters | 0.2893 | [0.2737, 0.3060] |
| 23 clusters | 0.2854 | [0.2686, 0.3008] |
| 24 clusters | 0.2767 | [0.2624, 0.2933] |
| 25 clusters | 0.3013 | [0.2851, 0.3171] |
| 26 clusters | 0.3036 | [0.2876, 0.3203] |
| 27 clusters | 0.3029 | [0.2887, 0.3197] |
| 28 clusters | 0.2944 | [0.2792, 0.3102] |
| 29 clusters | 0.2873 | [0.2715, 0.3022] |
| 30 clusters | 0.2519 | [0.2369, 0.2674] |

79

80 Supplementary Table 4. Mean grid scores and bootstrap CIs in the circular environment  
81 for each condition.

82

|             | Mean    | bootstrap CIs      |
|-------------|---------|--------------------|
| 10 clusters | 0.0293  | [0.0118, 0.0470]   |
| 11 clusters | -0.0097 | [-0.0263, 0.0054]  |
| 12 clusters | -0.0871 | [-0.0997, -0.0745] |
| 13 clusters | -0.1177 | [-0.1302, -0.1035] |
| 14 clusters | -0.0369 | [-0.0550, -0.0204] |
| 15 clusters | 0.1096  | [0.0921, 0.1282]   |
| 16 clusters | 0.1581  | [0.1414, 0.1774]   |
| 17 clusters | 0.1074  | [0.0912, 0.1233]   |
| 18 clusters | 0.0678  | [0.0525, 0.0837]   |
| 19 clusters | 0.0309  | [0.0161, 0.0466]   |
| 20 clusters | 0.0322  | [0.0181, 0.0468]   |
| 21 clusters | 0.0332  | [0.0179, 0.0505]   |
| 22 clusters | 0.0459  | [0.0279, 0.0633]   |
| 23 clusters | 0.0568  | [0.0385, 0.0751]   |
| 24 clusters | 0.0916  | [0.0723, 0.1094]   |
| 25 clusters | 0.0981  | [0.0793, 0.1143]   |
| 26 clusters | 0.1095  | [0.0902, 0.1272]   |
| 27 clusters | 0.1250  | [0.1092, 0.1415]   |
| 28 clusters | 0.1392  | [0.1232, 0.1538]   |
| 29 clusters | 0.1120  | [0.0973, 0.1275]   |
| 30 clusters | 0.1172  | [0.1012, 0.1330]   |

83

84 Supplementary Table 5. Mean grid scores and bootstrap CIs in the trapezoid  
85 environment for each condition.

|             | Mean   | bootstrap CIs    |
|-------------|--------|------------------|
| 10 clusters | 0.1998 | [0.1754, 0.2234] |
| 11 clusters | 0.1918 | [0.1749, 0.2096] |
| 12 clusters | 0.5556 | [0.5300, 0.5807] |
| 13 clusters | 0.4931 | [0.4671, 0.5162] |
| 14 clusters | 0.3924 | [0.3687, 0.4185] |
| 15 clusters | 0.1110 | [0.0869, 0.1365] |
| 16 clusters | 0.0550 | [0.0301, 0.0760] |
| 17 clusters | 0.1818 | [0.1551, 0.2073] |
| 18 clusters | 0.2865 | [0.2599, 0.3132] |
| 19 clusters | 0.2670 | [0.2427, 0.2900] |
| 20 clusters | 0.2619 | [0.2386, 0.2869] |
| 21 clusters | 0.2066 | [0.1851, 0.2283] |
| 22 clusters | 0.1856 | [0.1628, 0.2068] |
| 23 clusters | 0.1549 | [0.1309, 0.1779] |
| 24 clusters | 0.1398 | [0.1183, 0.1615] |
| 25 clusters | 0.1587 | [0.1360, 0.1832] |
| 26 clusters | 0.1549 | [0.1335, 0.1775] |
| 27 clusters | 0.1479 | [0.1231, 0.1680] |
| 28 clusters | 0.1470 | [0.1241, 0.1693] |
| 29 clusters | 0.1666 | [0.1448, 0.1874] |
| 30 clusters | 0.1377 | [0.1170, 0.1594] |

86

87 Supplementary Table 6. Mean grid difference scores and bootstrap CIs between the  
88 square and trapezoid environment for each condition.

89

|             | Mean   | bootstrap CIs     |
|-------------|--------|-------------------|
| 10 clusters | 0.0179 | [-0.0128, 0.0444] |
| 11 clusters | 0.1503 | [0.1263, 0.1765]  |
| 12 clusters | 0.1270 | [0.1063, 0.1492]  |
| 13 clusters | 0.0965 | [0.0786, 0.1151]  |
| 14 clusters | 0.0784 | [0.0540, 0.1013]  |
| 15 clusters | 0.0767 | [0.0491, 0.1089]  |
| 16 clusters | 0.1451 | [0.1141, 0.1784]  |
| 17 clusters | 0.2387 | [0.2069, 0.2691]  |
| 18 clusters | 0.3434 | [0.3106, 0.3761]  |
| 19 clusters | 0.3020 | [0.2723, 0.3361]  |
| 20 clusters | 0.2424 | [0.2131, 0.2700]  |
| 21 clusters | 0.2161 | [0.1875, 0.2423]  |
| 22 clusters | 0.1515 | [0.1237, 0.1768]  |
| 23 clusters | 0.0999 | [0.0746, 0.1278]  |
| 24 clusters | 0.1108 | [0.0848, 0.1388]  |
| 25 clusters | 0.1122 | [0.0834, 0.1392]  |
| 26 clusters | 0.0789 | [0.0508, 0.1055]  |
| 27 clusters | 0.0635 | [0.0359, 0.0940]  |
| 28 clusters | 0.0714 | [0.0421, 0.1013]  |
| 29 clusters | 0.0197 | [-0.0096, 0.0495] |
| 30 clusters | 0.0499 | [0.0214, 0.0754]  |

90

91 Supplementary Table 7. Mean grid difference scores and bootstrap CIs between the  
92 wide and narrow portion of the trapezoid environment for each condition.

93

94

95 **SUPPLEMENTARY REFERENCES**

96 1. Krupic, J., Burgess, N. & O'Keefe, J. Neural representations of location composed  
97 of spatially periodic bands. *Science*. **337**, 853–857 (2012).

98 2. Perez-Escobar, J. A., Kornienko, O., Latuske, P., Kohler, L. & Allen, K. Visual  
99 landmarks sharpen grid cell metric and confer context specificity to neurons of the  
100 medial entorhinal cortex. *Elife* **5**, e16937 (2016).

101

102
